# Supplementary material
Source: PubMed Central journal article supplement (PMC4116807)

1 **SUPPLEMENTARY INFORMATION**

2

3 **Supplementary Table 1: Determination of the equilibration time for dialysis experiments.** To  
4 determine the time required for the equilibration, dialysis units were set up with one chamber containing  
5 100  $\mu\text{M}$   $\text{AgNO}_3$  and the other containing only buffer.  $\text{AgNO}_3$  concentration was measured after 24, 48,  
6 72, and 96 hours by ICP-MS and is reported as a percentage of total metal content in both the chambers  
7 along with the standard error.

8

9

| <b>Time (hours)</b> | <b>% Metal content in Dialysis unit</b> |                  |
|---------------------|-----------------------------------------|------------------|
|                     | <b>Chamber 1</b>                        | <b>Chamber 2</b> |
| 24.00               | $64.52 \pm 2.62$                        | $35.48 \pm 1.02$ |
| 48.00               | $50.73 \pm 0.73$                        | $49.28 \pm 0.33$ |
| 72.00               | $49.16 \pm 0.33$                        | $50.84 \pm 3.40$ |
| 96.00               | $49.97 \pm 0.82$                        | $50.03 \pm 1.80$ |

10

11

12

13

14

15

16

17

18

19

20

21

22

1 **Supplementary Figure 1:** Schematic overview of the CusR/CusS two-component system. A) CusS is  
 2 shown as a dimer with domains labels. B) The amino acid sequence of the *E. coli* histidine kinase CusS  
 3 with transmembrane helices and domains indicated in color as predicted by KeGG database  
 4 ([http://www.genome.jp/dbget-bin/www\\_bget?eco:b0570](http://www.genome.jp/dbget-bin/www_bget?eco:b0570)) and HMMTOP and TMHMM transmembrane  
 5 topology prediction software (this work). The numbers in the sequence indicate the position of the  
 6 domain in the full-length CusS.

7 A)

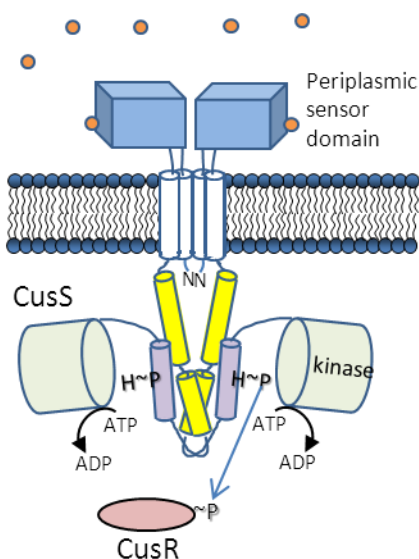

8

9 B)

10 1 mvskpfqrpfl slatrltffi slatiaaffa fawimihsvk vhaeqdind lkeisatler  
 11  
 12 61 vlnhpdetqa rrlmtlediv sgysnvlisl adsqgktvyh spgapdiref trdaipdkda  
 13  
 14 121 qggevyllsg ptmmpghgh ghmehsnwrmlnlpvgplvd gkpiytlyia lsidfhlhyi  
 15  
 16 181 ndlmnklimt asvisilivf ivllavhkgh apirsvsrqi qnitskdldv rldpqtvpie  
 17  
 18 241 leqlvlsfnh mieriedvft rqsnsadia heirtpitnl itqteialsq srsqkeledv  
 19  
 20 301 lysnleeltr makmvsdmlf laqadnnqli pekkmlnlad evgkvdfdf e alaedrgvel  
 21  
 22 361 rfvgdkcqva gdplmlrral snllsnalry tptgetivvr cqtvdhlvqv ivenpgtpia  
 23  
 24 421 pehlprlfd r fyrvdpsrqr kgegsgigla ivksivvahk gtvavtsdar gtrfvitlpa  
 25  
 26 **TM helices**  
 27 **HAMP**  
 28 **dimerization/phosphoacceptor**  
 29 **ATPase**  
 30 **39-187-cloned sensor domain**

1 **Supplementary Figure 2: Sedimentation velocity analytical ultracentrifugation analysis of  $\text{CuS}_s$**   
2 **samples in the presence of Zn(II) and Ni(II).** The  $c(s)$  distribution plots show one sedimentation species  
3 for each sample.

4  
5  
6  
7  
8  
9  
10  
11  
12  
13  
14  
15  
16  
17  
18  
19

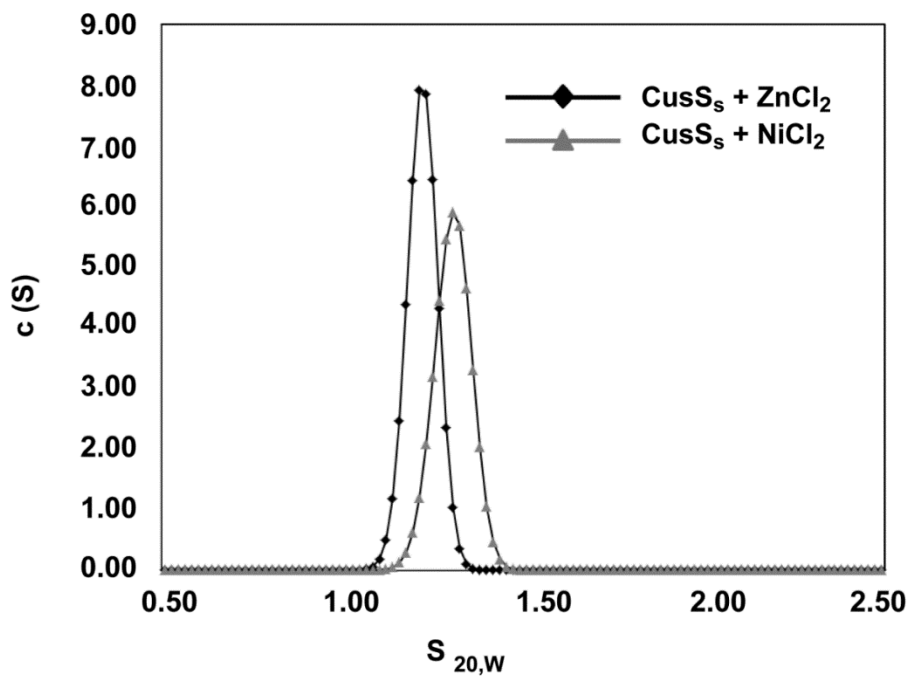

Supplement: NIHMS606736-supplement-01.pdf [file NIHMS606736-supplement-01.pdf]
